# Supplementary material for: Bifidobacterium bifidum Extracellular Sialidase Enhances Adhesion to the Mucosal Surface and Supports Carbohydrate Assimilation
Source: PubMed Central journal article supplement (PMC5626965; doi:10.1128/mbio.00928-17), 2017-10-03
Supplement: mbo005173503st1.pdf [file mbo005173503st1.pdf]

## SUPPLEMENTAL TABLE

**Table S1**

Primers used in this study.

| Primer     | Sequence (5' to 3')                       | Endonuclease* / Reference |
|------------|-------------------------------------------|---------------------------|
| KN149      | <u>AAGCTT</u> ATTCCCCGCCGAGTCGAAT         | <i>Hind</i> III           |
| KN150      | <u>AAGCTT</u> GAGTCGGCGAAGCCCTT           | <i>Hind</i> III           |
| KN154      | GATA <u>AAGCTT</u> TGCTGGATGGGAAGTGG      | <i>Hind</i> III           |
| KN155      | GATA <u>AAGCTT</u> TCAGTGAACGGAGCGG       | <i>Hind</i> III           |
| KN163      | ATGGTTCGTTCCGACCAAG                       |                           |
| KN165      | ATTTTTTTAATCTGTTATTTAAATAG                |                           |
| KN166      | ATGTTTGGATCAGGAGTT                        |                           |
| KN310      | GAATGC <u>CATATG</u> GCCAGCGATGATGCTGACA  | <i>Nde</i> I              |
| KN311      | AGATT <u>CTCGAG</u> TCAGTGAACGGAGCGGCG    | <i>Xho</i> I              |
| KN314      | GAATGCATATGCGGACGAAACACCCCAAGAA           | <i>Nde</i> I              |
| KN315      | AGATT <u>CTCGAG</u> TTACCGATTTCGCGCGACGGC | <i>Xho</i> I              |
| KN318      | <u>CATATG</u> AACCTCGGTACCGAATGC          | <i>Nde</i> I              |
| KN319      | <u>CTCGAG</u> CCAATCCATGGAAATGTGCG        | <i>Xho</i> I              |
| KN325      | ACCGGTGGCGGGCGGTC                         |                           |
| KN326      | GCCTGTCCATCGGCTC                          |                           |
| uvrD/Rep-F | ATACTCCGAGAATGCGGATG                      | (1)                       |
| uvrD/Rep-R | ACGACATCCCGCTCATATTC                      | (1)                       |
| KNq392     | TCGCCGACTCTCAGCTTGGC                      |                           |
| KNq393     | GGTGATGTCACGCGGCTTGC                      |                           |
| KN394      | GTAAATTTACATTTTCATTAGTCC                  |                           |
| KN395      | AGTTGAGAGTGGACTAAAACC                     |                           |
| KN396      | AAGGACGTGACCGTCACGGTGAAT                  |                           |
| KN397      | ACACTACCGTGACCGTCACCA                     |                           |

\*Restriction site is underlined in the sequence.

### Reference

- (1) **Turroni F, Foroni E, Montanini B, Viappiani A, Strati F, Duranti S, Ferrarini A, Delledonne M, van Sinderen D, Ventura M.** 2011. Global genome transcription profiling of *Bifidobacterium bifidum* PRL2010 under *in vitro* conditions and identification of reference genes for quantitative real-time PCR. *Appl Environ Microbiol* 77:8578–858
